# Supplementary material for: Fabrication of TiN/CNTs on carbon cloth substrates via a CVD–ALD method as free-standing electrodes for zinc ion hybrid capacitors
Source: Royal Society of Chemistry journal article supplement (doi:10.1039/d2nj02334b), 2022-01-01
Supplement: d2nj02334b1.pdf [file d2nj02334b1.pdf]

## Electronic Supplementary Information

Electronic Supplementary Information is attached in this section to further support research findings.

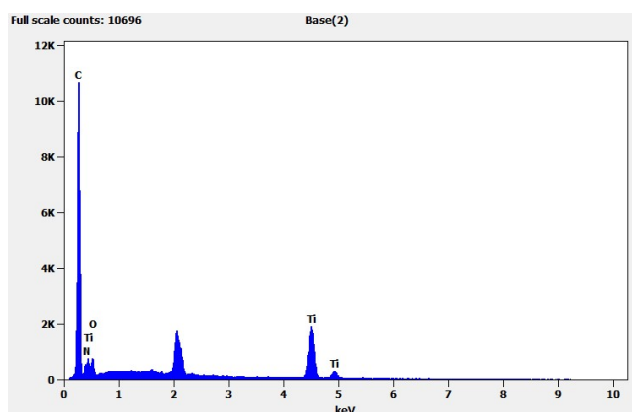

Fig. S1 Corresponding element content of enlarged area

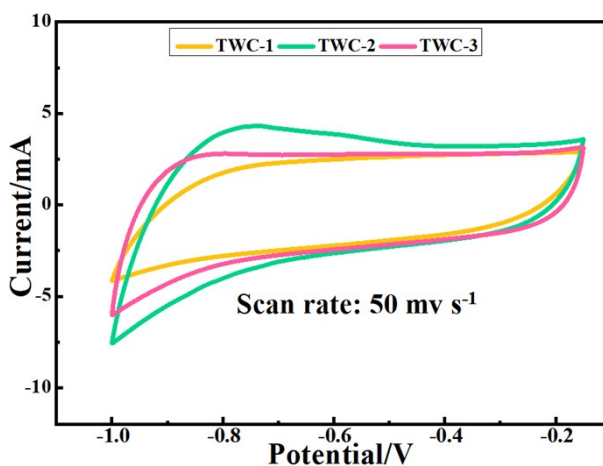

Fig. S2 CV Comparison of TWC-1, 2 and 3 at  $50 \text{ mV s}^{-1}$

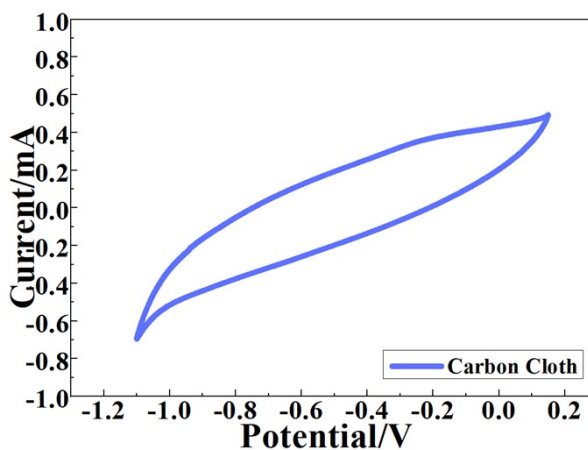

Fig. S3 CV of carbon cloth substrate at  $25 \text{ mV s}^{-1}$

**Table S1 load mass of active material and specific capacitance measured by mass ratio**

| Sample Num. | Load mass (mg) | Capacitance (F) | Current density<br>(A g <sup>-1</sup> ) | Specific<br>Capacitance (F g <sup>-1</sup> ) |
|-------------|----------------|-----------------|-----------------------------------------|----------------------------------------------|
| TWC-1       | 1.76           | 0.575           | 0.5                                     | 326.6                                        |
| TWC-2       | 1.87           | 0.194           | 0.5                                     | 363.5                                        |
| TWC-3       | 1.53           | 0.523           | 0.5                                     | 342.1                                        |

**Table S2 Fitting parameters for TWC-x**

| <b>TWC-1</b> | <b>Name</b> | <b>Parameter</b> | <b>Error</b> |
|--------------|-------------|------------------|--------------|
| 1            | Rs          | 5.41E+00         | 1.679        |
| 2            | Q-Yo1       | 3.28E-03         | 50.37        |
| 3            | Q-n1        | 6.15E-01         | 10.68        |
| 4            | R1          | 2.53E+00         | 8.099        |
| 5            | Q-Yo2       | 2.28E-02         | 1.132        |
| 6            | Q-n2        | 8.59E-01         | 1.052        |
| 7            | R2          | 9.84E+02         | 19.97        |
| <b>TWC-2</b> | <b>Name</b> | <b>Parameter</b> | <b>Error</b> |
| 1            | Rs          | 4.15E+00         | 2.319        |
| 2            | Q-Yo1       | 2.28E-02         | 1.325        |
| 3            | Q-n1        | 8.68E-01         | 1.038        |
| 4            | R1          | 1.15E+18         | 1.43E+16     |
| 5            | Q-Yo2       | 6.94E-03         | 76.01        |
| 6            | Q-n2        | 5.92E-01         | 17.3         |
| 7            | R2          | 1.77E+00         | 13.56        |
| <b>TWC-3</b> | <b>Name</b> | <b>Parameter</b> | <b>Error</b> |
| 1            | Rs          | 4.77E+00         | 2.305        |
| 2            | Q-Yo1       | 6.94E-03         | 55.65        |
| 3            | Q-n1        | 5.46E-01         | 13.85        |
| 4            | R1          | 2.56E+00         | 10.8         |
| 5            | Q-Yo2       | 2.18E-02         | 1.189        |

|   |      |          |       |
|---|------|----------|-------|
| 6 | Q-n2 | 8.90E-01 | 0.924 |
| 7 | R2   | 4.79E+04 | 474.3 |

**Table S3 Consumption of zinc in full cell**

| Sample Num. | Zin consumption (mg) | Cathode mass (mg) | Total mass (mg) |
|-------------|----------------------|-------------------|-----------------|
| TWC-1       | 0.37                 | 1.98              | 2.35            |
| TWC-2       | 0.43                 | 2.01              | 2.44            |
| TWC-3       | 0.62                 | 1.95              | 2.57            |

**Table S4 Technical parameters of carbon cloth**

|                                               |               |
|-----------------------------------------------|---------------|
| <b>Specific Capacitance (F/g) at 1.0 mA/g</b> | <b>37.8</b>   |
| <b>Thickness (mm)</b>                         | <b>0.36</b>   |
| <b>Basic mass (g/m<sup>2</sup>)</b>           | <b>130</b>    |
| <b>Resistivity (mΩ*cm<sup>2</sup>)</b>        | <b>&lt;5</b>  |
| <b>Tensile strength (N/cm)</b>                | <b>10</b>     |
| <b>Air permeability (sec)</b>                 | <b>&lt;10</b> |
